# Supplementary material for: Neuropilin-1 regulates platelet-derived growth factor receptor signalling in mesenchymal stem cells
Source: Oxford University Press journal article supplement (doi:10.1042/bj20091512), 2010-01-29
Supplement: bj4270029add.pdf [file bj4270029add.pdf]

SUPPLEMENTARY ONLINE DATA

Neuropilin-1 regulates platelet-derived growth factor receptor signalling in mesenchymal stem cells

Stephen G. BALL, Christopher BAYLEY, C. Adrian SHUTTLEWORTH and Cay M. KIELTY<sup>1</sup>

Wellcome Trust Centre for Cell-Matrix Research, Faculty of Life Sciences, University of Manchester, Manchester M13 9PT, U.K.

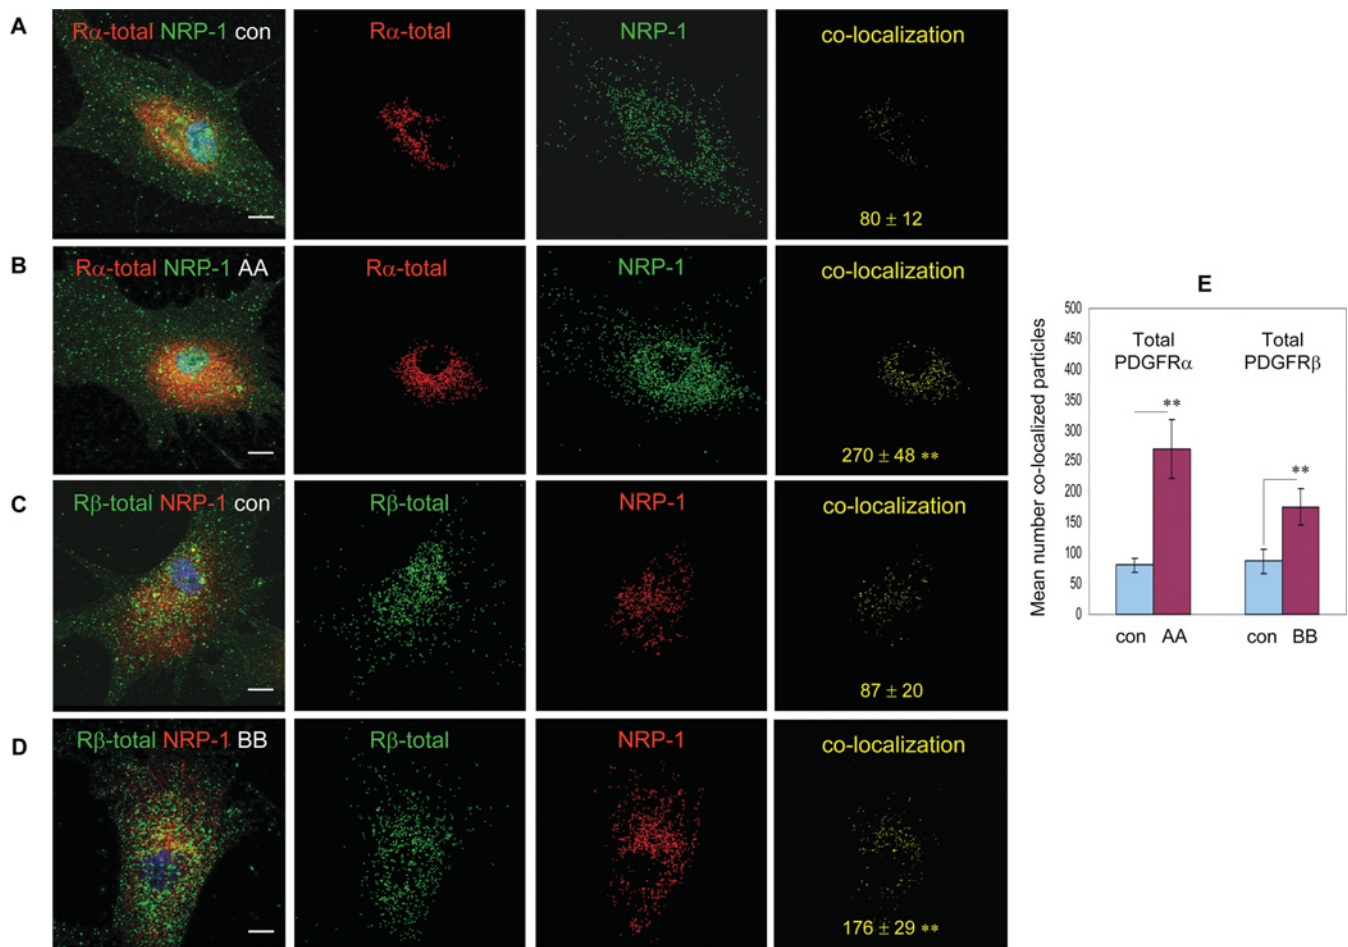

Figure S1 Co-localization of NRP-1 with total PDGFRs

The cellular distribution of NRP-1 and total PDGFRs was examined using pan-PDGFR antibodies. MSCs grown on 0.1% gelatin were cultured for 24 h in serum-free conditions, exposed to PDGF ligands, then co-localization of NRP-1 with either total PDGFR $\alpha$  or PDGFR $\beta$  was examined by immunofluorescence microscopy. (A) Control unstimulated and (B) exposed to 20 ng/ml PDGF-AA for 10 min, showing total PDGFR $\alpha$  (red) and NRP-1 (green). (C) Control unstimulated and (D) exposed to 20 ng/ml PDGF-BB for 10 min, showing total PDGFR $\beta$  (green) and NRP-1 (red). For each image, the corresponding red and green channels having similar threshold values and the same particle size range are shown, together with their co-localization represented by the image in yellow. The mean number of co-localized particles  $\pm$  S.D. derived from four different single-cell images is denoted in yellow. Nuclei are counter-stained with DAPI (blue). Representative images of at least six independent experiments are shown. Scale bars = 20  $\mu$ m. (E) Histogram showing the ligand-induced increase in co-localization between NRP-1 and total PDGFR $\alpha$  or PDGFR $\beta$ , as determined by immunofluorescence analysis. Values are the mean number of co-localized particles  $\pm$  S.D. derived from six different single-cell images. \*\* $P$  < 0.001, compared with the corresponding unstimulated control.

<sup>1</sup> To whom correspondence should be addressed (email cay.kielty@manchester.ac.uk).

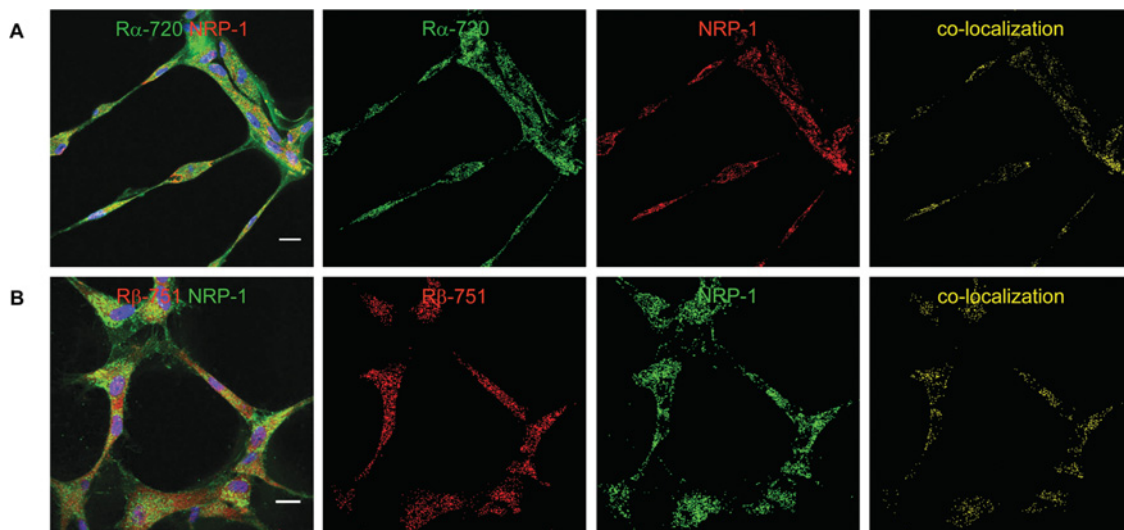

**Figure S2 Co-localization of NRP-1 with additional phosphorylated PDGFR sites**

The co-localization of NRP-1 with two additional PDGFR phosphorylation sites was examined during the assembly of MSC networks. MSCs were seeded on to Matrigel™ and cultured for 24 h, then co-localization of NRP-1 with either PDGFR $\alpha$  at site Tyr<sup>720</sup>, or PDGFR $\beta$  at site Tyr<sup>751</sup> was examined by immunofluorescence microscopy. **(A)** MSCs showing PDGFR $\alpha$ -Tyr<sup>720</sup> (green) and NRP-1 (red). **(B)** MSCs showing PDGFR $\beta$ -Tyr<sup>751</sup> (red) and NRP-1 (green). For each image, the corresponding red and green channels which have similar threshold values and the same particle size range are shown, together with their co-localization represented by the image in yellow. Nuclei are counterstained with DAPI (blue). Representative images of at least four independent experiments are shown. Scale bars = 20  $\mu$ m.

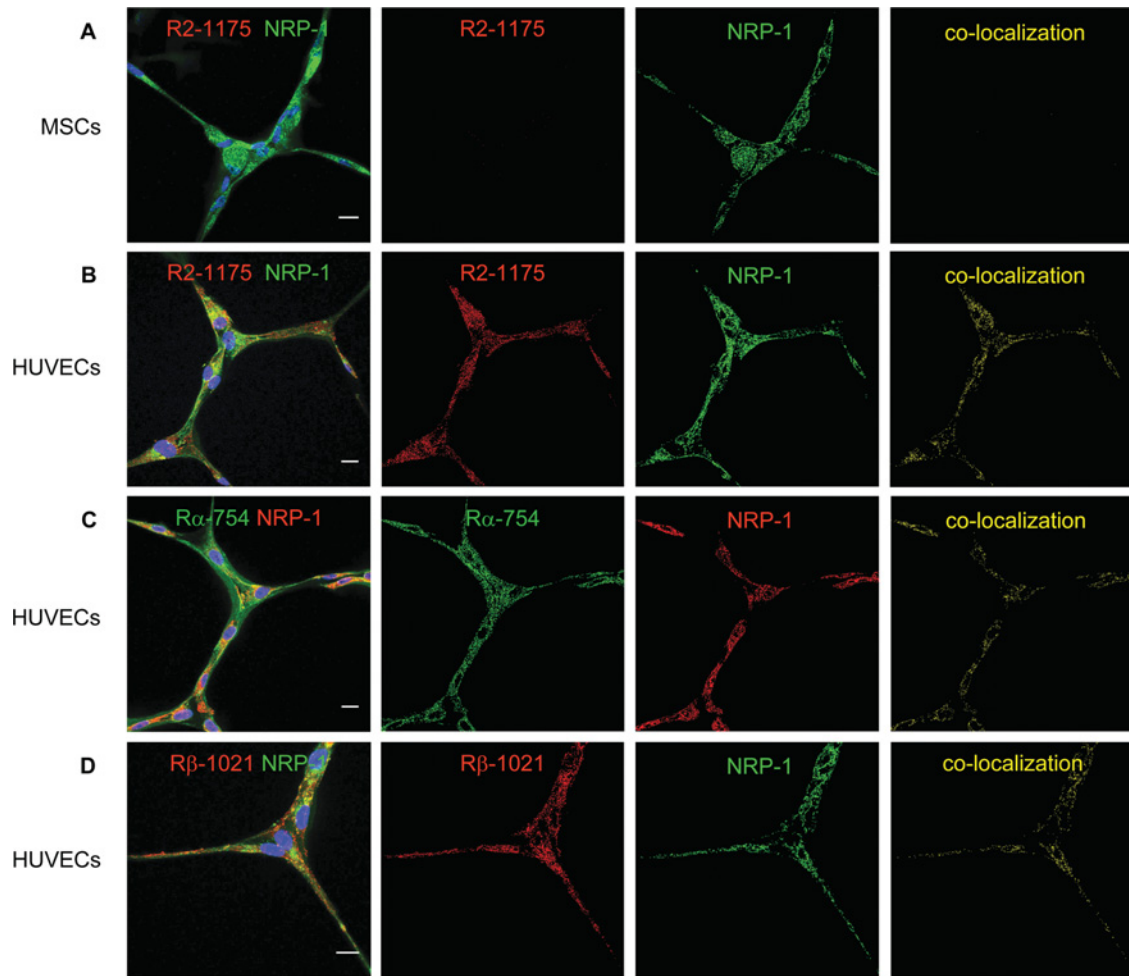

**Figure S3 NRP-1 co-localization with PDGFRs in HUVEC networks**

The co-localization of NRP-1 and PDGFRs was examined in HUVEC networks. HUVECs or MSCs were seeded on to Matrigel™ and cultured for 24 h, then co-localization of NRP-1 with either VEGFR2 at site Tyr<sup>1175</sup>, PDGFR $\alpha$  at site Tyr<sup>754</sup> or PDGFR $\beta$  at site Tyr<sup>1021</sup>, was examined by immunofluorescence microscopy. **(A)** MSCs showing VEGFR2-Tyr<sup>1175</sup> (red) and NRP-1 (green). **(B)** HUVECs showing VEGFR2-Tyr<sup>1175</sup> (red) and NRP-1 (green). **(C)** HUVECs showing PDGFR $\alpha$ -Tyr<sup>754</sup> (green) and NRP-1 (red). **(D)** HUVECs showing PDGFR $\beta$ -Tyr<sup>1021</sup> (red) and NRP-1 (green). For each image, the corresponding red and green channels which have similar threshold values and the same particle size range are shown, together with their co-localization represented by the image in yellow. Nuclei are counterstained with DAPI (blue). Representative images of at least three independent experiments are shown. Scale bars = 20  $\mu$ m.

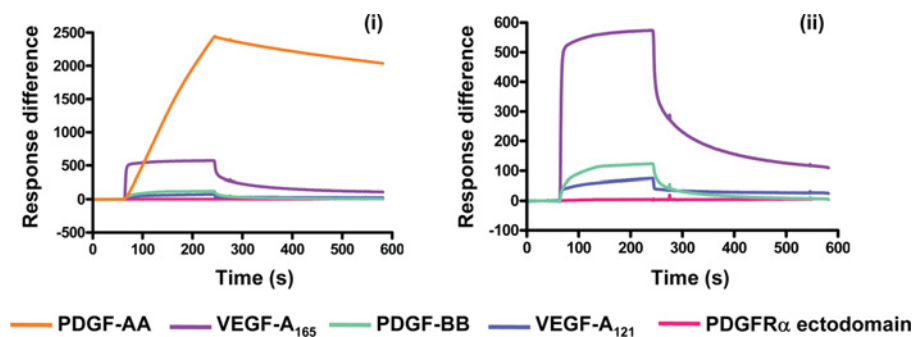

**Figure S4 NRP-1 interactions with PDGF ligands and PDGFR $\alpha$**

BIAcore analysis was used to examine the interactions between immobilized recombinant NRP-1 (R&D Systems) and soluble ligands PDGF-AA, PDGF-BB, VEGF-A<sub>165</sub>, VEGF-A<sub>121</sub> and a recombinant PDGFR $\alpha$  ectodomain (produced by C. Bayley). Soluble ligands were injected over NRP-1 immobilized on a CM5 chip. The response difference denotes the level of interaction above respective control flow cells. (i) PDGF-AA displayed the highest binding affinity for NRP-1; however, this ligand was difficult to evaluate using BIAcore analysis, due to a high level of interaction with control flow cells [1]. (ii) Smaller response difference scale, showing VEGF-A<sub>165</sub>, PDGF-BB and VEGF-A<sub>121</sub> bound to NRP-1 with decreasing affinity, but the PDGFR $\alpha$  ectodomain exhibited no detectable binding. Data shown are representative of three independent experiments.

## REFERENCE

- 1 Goretzki, L., Burg, M. A., Grako, K. A. and Stallcup, W. B. (1999) High-affinity binding of basic fibroblast growth factor and platelet-derived growth factor-AA to the core protein of the NG2 proteoglycan. *J. Biol. Chem.* **274**, 16831–16837

Received 30 September 2009/25 January 2010; accepted 26 January 2010  
 Published as BJ Immediate Publication 26 January 2010, doi:10.1042/BJ20091512
